# Supplementary material
Source: publisher figshare collection journal article supplement (https://acs.figshare.com/ndownloader/files/10234887)
Supplement: Supplementary file 1 [file 10234887]

# Supporting Information

## Near-Infrared Cyanine Loaded Liposome-Like Nanocapsules of Camptothecin-Floxuridine Conjugate for Enhanced Chemophotothermal Combination Cancer therapy

*Chuang Gao<sup>1, ‡</sup>, Xiaolong Liang<sup>2, ‡</sup>, Shanyan Mo<sup>1, ‡</sup>, Nisi Zhang<sup>1</sup>, Desheng Sun<sup>3\*</sup> and Zhifei Dai<sup>1,\*</sup>*

<sup>1</sup> Department of Biomedical Engineering, College of Engineering, Peking University, Beijing, 100871, China

<sup>2</sup> Department of Ultrasound, Peking University Third Hospital, Beijing 100191, China

<sup>3</sup> Peking University Shenzhen Hospital, Shenzhen 518036, China

<sup>‡</sup> These authors contributed equally to this work.

\* Corresponding author, E-mail: [zhifei.dai@pku.edu.cn](mailto:zhifei.dai@pku.edu.cn)

Homepage: <http://www.mimit-pku.org>

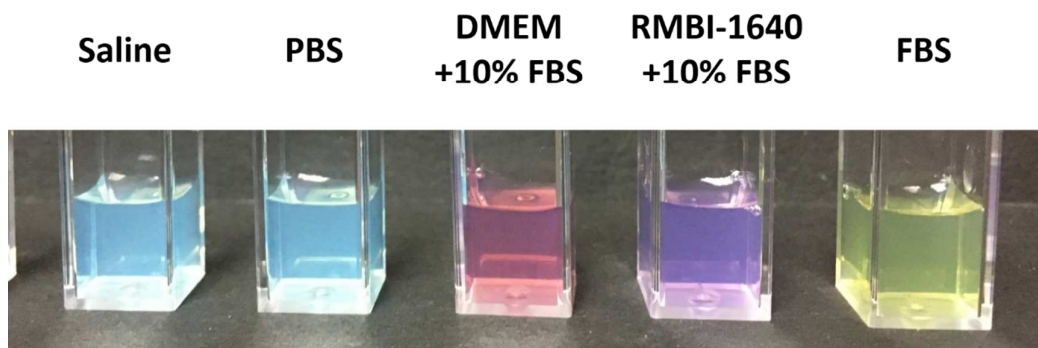

**Figure S1.** Photos of CF-DiR NCs (8:2:2) dispersed in Saline, PBS, DMEM culture media containing 10% FBS, RPMI-1640 culture media containing 10% FBS and fetal bovine serum (FBS).

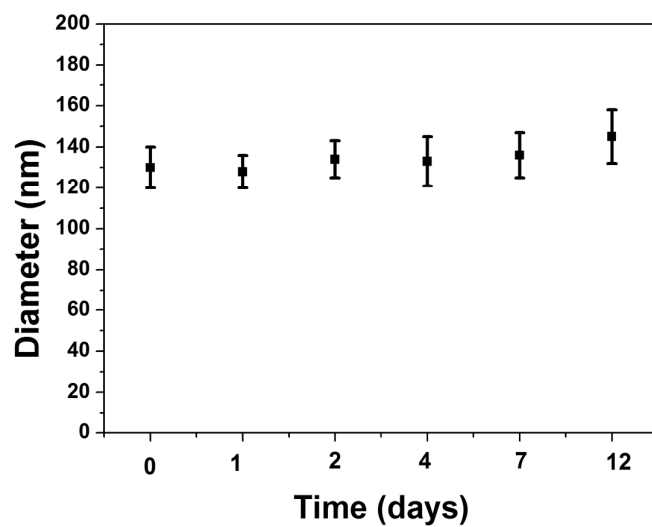

**Figure S2.** The diameter changes of the CF-DiR NCs in PBS buffer within 12 days as measured by DLS measurements.

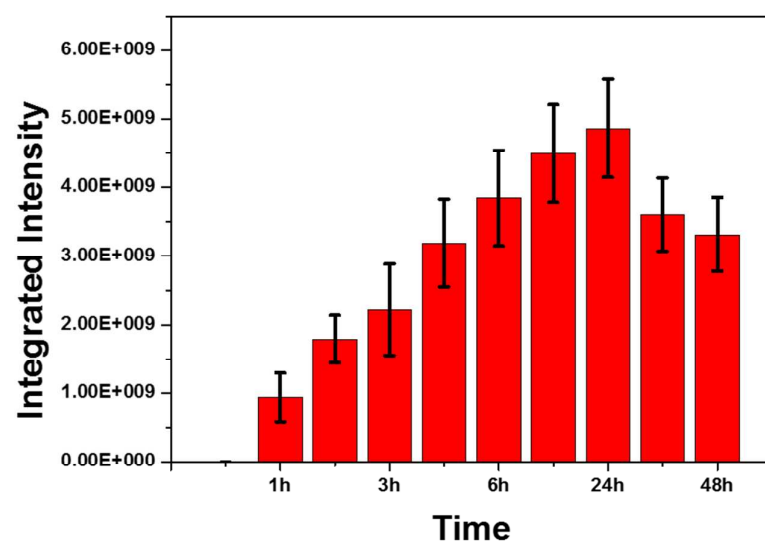

**Figure S3.** Integrated fluorescence intensity of tumor obtained after tail vein injection of CF-DiR NCs.
